# Supplementary material for: Comparative Analysis of Cd Uptake and Tolerance in Two Mangrove Species (Avicennia marina and Rhizophora stylosa) with Distinct Apoplast Barriers
Source: MDPI journal article supplement (doi:10.3390/plants12223786), 2023-11-07
Supplement: s1 [file s1]

## Supplementary Materials

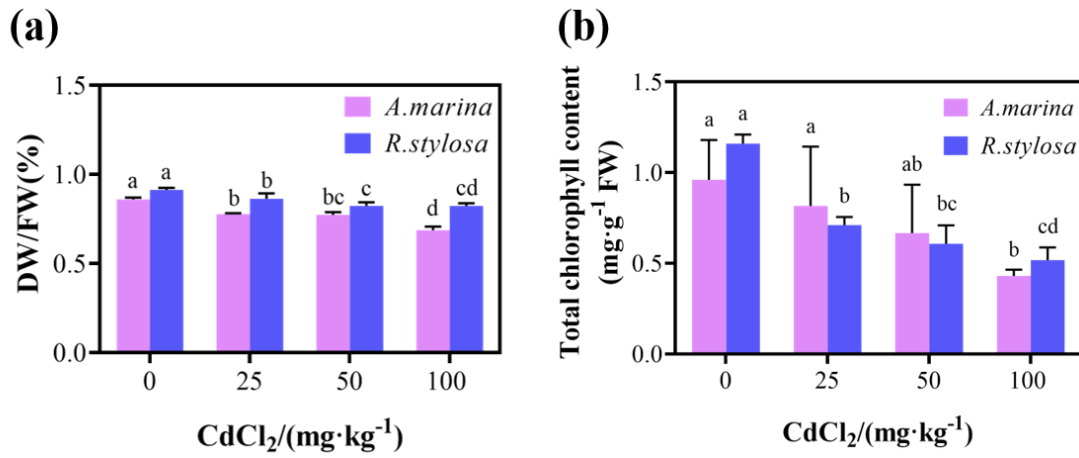

**Figure S1.** The biomass (a) and chlorophyll content (b) of both *A. marina* and *R. stylosa* under cadmium stress. DW = dry weight (g), Fw = fresh weight (g). Different letters within the same organ indicate significant differences between treatments as determined by one-way ANOVA ( $p < 0.05$ ).
